# Supplementary material
Source: PubMed Central journal article supplement (PMC4454361)
Supplement: NIHMS695306-supplement-Supp_FigureS1.pdf [file NIHMS695306-supplement-Supp_FigureS1.pdf]

**Supplementary Material to:**

**Bioenergetic adaptation in response to autophagy regulators during  
rotenone exposure**

Samantha Giordano<sup>1,2</sup>, Matthew Dodson<sup>1,2</sup>, Saranya Ravi<sup>1,2</sup>, Matthew Redmann<sup>1,2</sup>, Xiaosen  
Ouyang<sup>1,2,3</sup>, Victor M Darley Usmar<sup>1,2</sup>, and Jianhua Zhang<sup>1,2,3\*</sup>

<sup>1</sup>Department of Pathology, <sup>2</sup>Center for Free Radical Biology, University of Alabama at  
Birmingham, <sup>3</sup>Department of Veterans Affairs, Birmingham VA Medical Center

\*Corresponding author: Jianhua Zhang, Ph.D.

Department of Pathology

University of Alabama at Birmingham

BMRII-534, 901 19<sup>th</sup> Street S.

Birmingham, AL 35294-0017

Phone: 205-996-5153; Fax: 205-934-7447;

Email: [zhanja@uab.edu](mailto:zhanja@uab.edu)

## Supplementary Figure 1

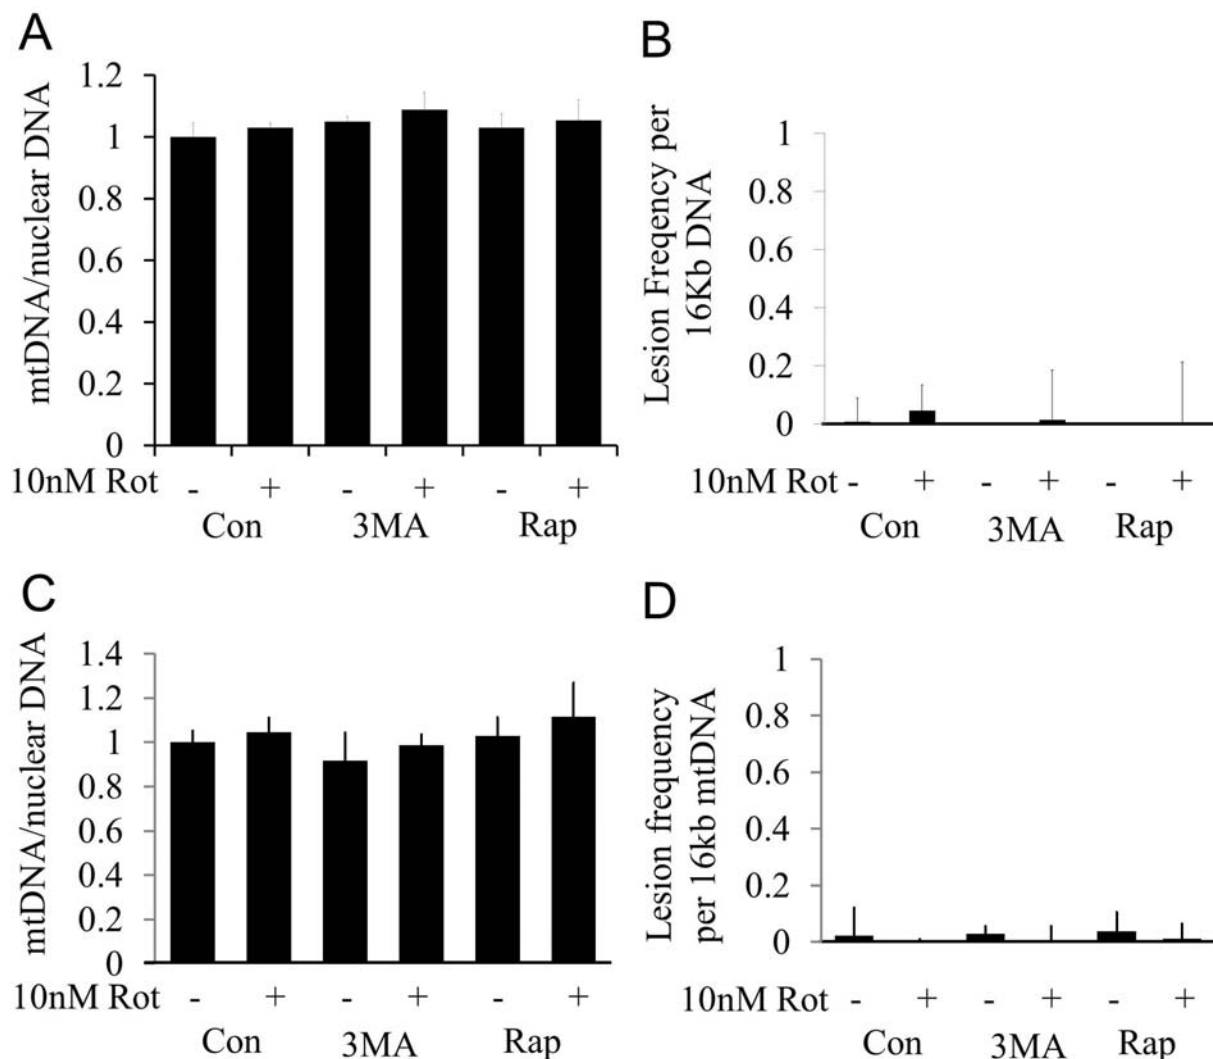

**Supplementary Figure 1. Effects of rotenone ± rapamycin or 3MA on mitochondrial number and damage.** (A) Mitochondrial number represented by mitochondrial to nuclear DNA ratio was plotted following 10 nM rotenone ± rapamycin or 3MA for 2 hrs. (B) Mitochondrial damage is represented by lesion frequency per 16 kb mtDNA, and was plotted following 10 nM rotenone ± rapamycin or 3MA for 2 hrs. Data=mean±SEM, n=3. (C) Mitochondrial number represented by mitochondrial to nuclear DNA ratio was plotted following 10 nM rotenone ± rapamycin or 3MA for 24 hrs. (D) Mitochondrial damage is represented by lesion frequency per 16 kb mtDNA, and was plotted following 10 nM rotenone ± rapamycin or 3MA for 24 hrs. Data=mean±SEM, n=3.
